# Supplementary material for: Molecular identification based on mtDNA analysis of commercial crustaceans in the coastal Amazon: exotic species, cryptic diversity, and implications for sustainable fisheries in northern Brazil
Source: PeerJ. 2025 Oct 13;13:e19586. doi: 10.7717/peerj.19586 (PMC12530202; doi:10.7717/peerj.19586)
Supplement: Supplemental Information 2 [file peerj-13-19586-s002.xlsx]

## Sheet: Planilha1
Haplotype	COI region	Sample	Location	Commercial designation	NCBI/BOLD identity	NCBI/BOLD similarity	NCBI/BOLD access code
1	I	Cbr01	"Feira Livre"	"Camarão branco"	Penaeus schmitti	100%/100%	MT607578/PENAE056
2	I	Cca14	"Feira Livre"	"Camarão cascudo"	Penaeus vannamei	100%/100%	MW027142/GBMNB54360
3	I	Cbr55	"Feira Livre"	"Camarão branco'	Penaeus isabelae	99,82%/99,82%	MG662009/GBCMD31194
4	I	Cca10	"Feira Livre"	"Camarão cascudo"	Penaeus isabelae	98,93%/98,92%	MG662009/GBCMD31194
5	I	ct04	"Ajureteua"	"Camarão tigre"	Penaeus monodon clade A	100%/100%	MT449918/GBMNF10111
5	I	Cca33	"Feira Livre"	"Camarão cascudo"	Penaeus monodon clade A	100%/100%	MT449918/GBMNF10111
6	I	ct05*	"Ajureteua"	"Camarão tigre"	Penaeus monodon clade B	100%/100%	MT449922/GBMNC67825
7	I	Cbr19	"Feira Livre"	"Camarão branco"	Xiphopenaeus dincao	100%/100%	KY449120/GBCMD25426
8	I	Cpi04	"Feira Livre"	"Camarão branco"	Xiphopenaeus kroyeri	100%/100%	KY449079/GBCMD25385
8	I	Cpi03	"Feira Livre"	"Camarão piré"	Xiphopenaeus kroyeri	100%/100%	KY449079/GBCMD25385
8	I	Cpi24	"Feira Livre"	"Camarão piré"	Xiphopenaeus kroyeri	100%/100%	KY449079/GBCMD25385
9	I	Cpi13	"Feira Livre"	"Camarão piré"	Xiphopenaeus kroyeri	99,64%/99,64%	KY449079/GBCMD25385
9	I	Cpi16	"Feira Livre"	"Camarão piré"	Xiphopenaeus kroyeri	99,64%/99,64%	KY449079/GBCMD25385
9	I	Cpi15	"Feira Livre"	"Camarão piré"	Xiphopenaeus kroyeri	99,64%/99,64%	KY449079/GBCMD25385
10	I	Carc05*	"Feira Livre"	"Camarão arco-íris"	Mierspenaeopsis sculptilis	100%/ 100%	KP297897/GBMNC67910
10	I	Cts03	"Feira Livre"	"Camarão tigre"	Mierspenaeopsis sculptilis	100%/ 100%	KP297897/GBMNC67910
11	I	cam01*	"Feira Livre"	"Camarão da Amazônia"	Macrobrachium rosenbergii	100%/ 100%	OL824984/ANGEN102
11	I	cpit02*	"Feira Livre"	"Camarão pitu"	Macrobrachium rosenbergii	100%/ 100%	OL824984/ANGEN102
11	I	cpit04*	"Feira Livre"	"Camarão pitu"	Macrobrachium rosenbergii	100%/ 100%	OL824984/ANGEN102
12	I	cpi43*	"Feira Livre"	"Camarão piré"	Macrobrachium equidens	99,82%/99,82%	MW479976/GBMND16080
12	I	cca01*	"Feira Livre"	"Camarão cascudo"	Macrobrachium equidens	99,82%/99,82%	MW479976/GBMND16080
13	I	Car01	"Feira Livre"	"Caranguejo"	Ucides cordatus	99,82%/100%	KU313508/GBCMD22808
13	I	Car09*	"Feira Livre"	"Caranguejo"	Ucides cordatus	99,82%/100%	KU313508/GBCMD22808
13	I	Car13*	"Feira Livre"	"Caranguejo"	Ucides cordatus	99,82%/100%	KU313508/GBCMD22808
14	I	Car02	"Feira Livre"	"Caranguejo"	Ucides cordatus	100%/99,82%	KU313508/GBCMD22808
14	I	Car11*	"Feira Livre"	Caranguejo"	Ucides cordatus	100%/99,82%	KU313508/GBCMD22808
15	I	Car12*	"Feira Livre"	"Caranguejo"	Ucides cordatus	99,29%/99,10%	KU313508/GBCMD22808
16	I	Car15*	"Feira Livre"	"Caranguejo"	Ucides cordatus	99,46%/99,28%	KU313508/GBCMD22808
17	I	Car16*	"Feira Livre"	"Caranguejo"	Ucides cordatus	99,64%/99,46%	KU313508/GBCMD22808
18	I	Sir05	"Feira Livre"	"Siri"	Callinectes bocourti	99,11%/99,10%	MG462542/GBCMD28602
19	I	Sir06	"Feira Livre"	"Siri"	Callinectes bocourti	99,64%/99,64%	MG462542/GBCMD28602
20	I	Sir08	"Feira Livre"	"Siri"	Callinectes bocourti	100%/100%	MG462542/GBCMD28602
21	I	Sir09	"Feira Livre"	"Siri"	Callinectes bocourti	99,82%/99,82%	MG462542/GBCMD28602
22	I	Sir01	"Feira Livre"	"Siri"	Callinectes bocourti	99,82%/99,82%	MG462542/GBCMD28602
23	I	Sir02*	"Feira Livre"	"Siri"	Callinectes bocourti	99,82%/99,82%	MG462542/GBCMD28602
24	I	Lag01	"Feira Livre"	"Lagosta vermelha"	Panulirus meripurpuratus	99,46%/99,46%	MF490043/GBCMD28243
25	I	Lag02	"Feira Livre"	"Lagosta vermelha"	Panulirus meripurpuratus	99,46%/99,46%	MF490043/GBCMD28243
26	I	Lsa03	"Feira Livre"	"Lagosta sapata"	Panulirus laevicauda	98,21%/99,10%	AF339462/Early-Release
1	II	cbr56	"Ajureteua"	"Camarão branco"	Penaeus schmitti	1	AY135189
1	II	cbr67	"Ajureteua"	"Camarão branco"	Penaeus schmitti	1	AY135189
1	II	cbr35	"Feira Livre"	"Camarão branco"	Penaeus schmitti	1	AY135189
1	II	cbr40	"Feira Livre"	"Camarão branco"	Penaeus schmitti	1	AY135189
1	II	cbr18	"Feira Livre"	"Camarão branco"	Penaeus schmitti	1	AY135189
1	II	cbr54	"Feira Livre"	"Camarão branco"	Penaeus schmitti	1	AY135189
1	II	cbr62	"Ajureteua"	"Camarão branco"	Penaeus schmitti	1	AY135189
1	II	cbr63	"Ajureteua"	"Camarão branco"	Penaeus schmitti	1	AY135189
1	II	cbr71	"Ajureteua"	"Camarão branco"	Penaeus schmitti	1	AY135189
1	II	cbr12	"Feira Livre"	"Camarão branco"	Penaeus schmitti	1	AY135189
2	II	cbr17	"Feira Livre"	"Camarão branco"	Penaeus schmitti	0.9976	AY135189
2	II	cbr45	"Feira Livre"	"Camarão branco"	Penaeus schmitti	0.9976	AY135189
3	II	cbr05	"Feira Livre"	"Camarão branco"	Penaeus schmitti	0.9953	AY135189
4	II	cca05	"Feira Livre"	"Camarão cascudo"	Penaeus vannamei	1	MT178583
4	II	cva01	"Feira Livre"	"Camarão vananeio"	Penaeus vannamei	1	MT178583
4	II	cva02	"Feira Livre"	"Camarão vananeio"	Penaeus vannamei	1	MT178583
4	II	cca34	"Feira Livre"	"Camarão cascudo"	Penaeus vannamei	1	MT178583
4	II	cgr03	"Feira Livre"	"Camarão grazado"	Penaeus vannamei	1	MT178583
4	II	cca13	"Feira Livre"	"Camarão cascudo"	Penaeus vannamei	1	MT178583
4	II	cca12	"Feira Livre"	"Camarão cascudo"	Penaeus vannamei	1	MT178583
5	II	cca04	"Feira Livre"	"Camarão cascudo"	Penaeus vannamei	0.9976	MT178583
5	II	cpic02	"Feira Livre"	"Camarão piticaia"	Penaeus vannamei	0.9976	MT178583
5	II	cve02	"Feira Livre"	"Camarão vermelho"	Penaeus vannamei	0.9976	MT178583
6	II	cca23	"Feira Livre"	"Camarão cascudo"	Penaeus vannamei	0.9953	MT178583
6	II	cca06	"Feira Livre"	"Camarão cascudo"	Penaeus vannamei	0.9953	MT178583
7	II	cpi42	"Feira Livre"	"Camarão piré"	Penaeus isabelae	1	MN240522
7	II	cpi38	"Feira Livre"	"Camarão piré"	Penaeus isabelae	1	MN240522
7	II	cca35	"Feira Livre"	"Camarão cascudo"	Penaeus isabelae	1	MN240522
7	II	cbr14	"Feira Livre"	"Camarão branco"	Penaeus isabelae	1	MN240522
7	II	cbr08	"Feira Livre"	"Camarão branco"	Penaeus isabelae	1	MN240522
7	II	cca08	"Feira Livre"	"Camarão cascudo"	Penaeus isabelae	1	MN240522
7	II	cbr20	"Feira Livre"	"Camarão branco"	Penaeus isabelae	1	MN240522
7	II	cpi25	"Feira Livre"	"Camarão piré"	Penaeus isabelae	1	MN240522
7	II	cpi27	"Feira Livre"	"Camarão piré"	Penaeus isabelae	1	MN240522
7	II	cba02	"Feira Livre"	"Camarão bate pé"	Penaeus isabelae	1	MN240522
7	II	cbr02	"Feira Livre"	"Camarão branco"	Penaeus isabelae	1	MN240522
8	II	cbr32	"Feira Livre"	"Camarão branco"	Penaeus isabelae	0.9929	MN240522
8	II	cbr53	"Feira Livre"	"Camarão branco"	Penaeus isabelae	0.9929	MN240522
8	II	cbr55	"Feira Livre"	"Camarão branco"	Penaeus isabelae	0.9929	MN240522
8	II	cca25	"Feira Livre"	"Camarão cascudo"	Penaeus isabelae	0.9929	MN240522
8	II	cca29	"Feira Livre"	"Camarão cascudo"	Penaeus isabelae	0.9929	MN240522
8	II	cbr23	"Feira Livre"	"Camarão branco"	Penaeus isabelae	0.9929	MN240522
8	II	cbr29	"Feira Livre"	"Camarão branco"	Penaeus isabelae	0.9929	MN240522
8	II	cca26	"Feira Livre"	"Camarão cascudo"	Penaeus isabelae	0.9929	MN240522
8	II	cca28	"Feira Livre"	"Camarão cascudo"	Penaeus isabelae	0.9929	MN240522
8	II	cca09	"Feira Livre"	"Camarão cascudo"	Penaeus isabelae	0.9929	MN240522
8	II	cpi41	"Ajureteua"	"Camarão piré"	Penaeus isabelae	0.9929	MN240522
8	II	cbr09	"Feira Livre"	"Camarão branco"	Penaeus isabelae	0.9929	MN240522
8	II	cbr15	"Feira Livre"	"Camarão branco"	Penaeus isabelae	0.9929	MN240522
8	II	cpi10	"Feira Livre"	"Camarão piré"	Penaeus isabelae	0.9929	MN240522
8	II	cbr21	"Feira Livre"	"Camarão branco"	Penaeus isabelae	0.9929	MN240522
8	II	cca30	"Feira Livre"	"Camarão cascudo"	Penaeus isabelae	0.9929	MN240522
8	II	cbr24	"Feira Livre"	"Camarão branco"	Penaeus isabelae	0.9929	MN240522
8	II	cbr34	"Feira Livre"	"Camarão branco"	Penaeus isabelae	0.9929	MN240522
8	II	cpi33	"Feira Livre"	"Camarão piré"	Penaeus isabelae	0.9929	MN240522
9	II	cca33	"Feira Livre"	"Camarão cascudo"	Penaeus isabelae	0.9976	MN240522
10	II	cca07	"Feira Livre"	"Camarão cascudo"	Penaeus isabelae	0.9953	MN240522
11	II	cbr42	"Feira Livre"	"Camarão branco"	Penaeus isabelae	0.9882	MN240522
12	II	cts04	"Feira Livre"	"Camarão tigre"	Penaeus monodon clade A	0.9976	KX459267
13	II	ct05	"Ajureteua"	"Camarão tigre"	No match		-
14	II	cpi15	"Feira Livre"	"Camarão piré"	Xiphopenaeus kroyeri	1	DQ084368
14	II	cpi40	"Ajureteua"	"Camarão piré"	Xiphopenaeus kroyeri	1	DQ084368
14	II	cpi45	"Ajureteua"	"Camarão piré"	Xiphopenaeus kroyeri	1	DQ084368
14	II	cpi36	"Feira Livre"	"Camarão piré"	Xiphopenaeus kroyeri	1	DQ084368
14	II	cpi11	"Feira Livre"	"Camarão piré"	Xiphopenaeus kroyeri	1	DQ084368
14	II	cpi22	"Feira Livre"	"Camarão piré"	Xiphopenaeus kroyeri	1	DQ084368
14	II	cgr02	"Feira Livre"	"Camarão grazado"	Xiphopenaeus kroyeri	1	DQ084368
15	II	cpi44	"Ajureteua"	"Camarão piré"	Xiphopenaeus kroyeri	0.9976	DQ084368
15	II	cpi24	"Feira Livre"	"Camarão piré"	Xiphopenaeus kroyeri	0.9976	DQ084368
15	II	cpi29	"Feira Livre"	"Camarão piré"	Xiphopenaeus kroyeri	0.9976	DQ084368
15	II	cpi20	"Feira Livre"	"Camarão piré"	Xiphopenaeus kroyeri	0.9976	DQ084368
15	II	cpi03	"Feira Livre"	"Camarão piré"	Xiphopenaeus kroyeri	0.9976	DQ084368
15	II	cpi08	"Feira Livre"	"Camarão piré"	Xiphopenaeus kroyeri	0.9976	DQ084368
15	II	cpi23	"Feira Livre"	"Camarão piré"	Xiphopenaeus kroyeri	0.9976	DQ084368
16	II	cpi46	"Ajureteua"	"Camarão piré"	Xiphopenaeus kroyeri	0.9976	DQ084368
17	II	cpi12	"Feira Livre"	"Camarão piré"	Xiphopenaeus kroyeri	0.9976	DQ084368
18	II	cpi39	"Ajureteua"	"Camarão piré"	Xiphopenaeus dincao	1	DQ084376
18	II	cpi05	"Feira Livre"	"Camarão piré"	Xiphopenaeus dincao	1	DQ084376
18	II	cpi01	"Feira Livre"	"Camarão piré"	Xiphopenaeus dincao	1	DQ084376
18	II	cpi35	"Feira Livre"	"Camarão piré"	Xiphopenaeus dincao	1	DQ084376
19	II	cpic01	"Feira Livre"	"Camarão piticaia"	Xiphopenaeus dincao	0.9982	DQ084376
19	II	cpi13	"Feira Livre"	"Camarão piré"	Xiphopenaeus dincao	0.9982	DQ084376
20	II	carc01	"Feira Livre"	"Camarão arco-íris"	Mierspenaeopsis sculptilis	0.9765	MT178686
20	II	carc03	"Feira Livre"	"Camarão arco-íris"	Mierspenaeopsis sculptilis	0.9765	MT178687
20	II	carc04	"Feira Livre"	"Camarão arco-íris"	Mierspenaeopsis sculptilis	0.9765	MT178688
20	II	carc05	"Feira Livre"	"Camarão arco-íris"	Mierspenaeopsis sculptilis	0.9765	MT178689
20	II	carc06	"Feira Livre"	"Camarão arco-íris"	Mierspenaeopsis sculptilis	0.9765	MT178690
20	II	carc07	"Feira Livre"	"Camarão arco-íris"	Mierspenaeopsis sculptilis	0.9765	MT178691
20	II	carc09	"Feira Livre"	"Camarão arco-íris"	Mierspenaeopsis sculptilis	0.9765	MT178692
20	II	cts02	"Feira Livre"	"Camarão tigre"	Mierspenaeopsis sculptilis	0.9765	MT178693
20	II	cts01	"Feira Livre"	"Camarão tigre"	Mierspenaeopsis sculptilis	0.9765	MT178694
21	II	cam02	"Feira Livre"	"Camarão da Amazônia"	Macrobrachium equidens	1	KM255682
21	II	cca01	"Feira Livre"	"Camarão cascudo"	Macrobrachium equidens	1	KM255682
22	II	cpi43	"Feira Livre"	"Camarão piré"	Macrobrachium equidens	0.9953	KM255682
23	II	cca02	"Feira Livre"	"Camarão cascudo"	Macrobrachium equidens	0.9953	KM255682
24	II	cam01	"Feira Livre"	"Camarão da Amazônia"	Macrobrachium rosenbergii	1	MK782972
24	II	cpit04	"Feira Livre"	"Camarão pitu"	Macrobrachium rosenbergii	1	MK782972
24	II	cpit02	"Feira Livre"	"Camarão pitu"	Macrobrachium rosenbergii	1	MK782972
25	II	cpit01	"Feira Livre"	"Camarão pitu"	Macrobrachium rosenbergii	0.9953	MK782972
26	II	car13	"Feira Livre"	"Caranguejo"	Sem correspondência		Não possui
26	II	car09	"Feira Livre"	"Caranguejo"	Sem correspondência		Não possui
27	II	car11	"Feira Livre"	"Caranguejo"	Sem correspondência		Não possui
28	II	car12	"Feira Livre"	"Caranguejo"	Sem correspondência		Não possui
29	II	car15	"Feira Livre"	"Caranguejo"	Sem correspondência		Não possui
30	II	car16	"Feira Livre"	"Caranguejo"	Sem correspondência		Não possui
30	II	car18	"Feira Livre"	"Caranguejo"	Sem correspondência		Não possui
31	II	car06	"Feira Livre"	"Caranguejo"	Sem correspondência		Não possui
32	II	car07	"Feira Livre"	"Caranguejo"	Sem correspondência		Não possui
33	II	sir11	"Ajureteua"	"Siri"	Callinectes danae	0.9929	MH062450
33	II	sir12	"Ajureteua"	"Siri"	Callinectes danae	0.9929	MH062450
33	II	sir13	"Ajureteua"	"Siri"	Callinectes danae	0.9929	MH062450
34	II	sir14	"Ajureteua"	"Siri"	Callinectes danae	0.9882	MH062450
35	II	sir02	"Feira Livre"	"Siri"	No match		-
* samples with successful sequencing of both COI regions
