# Supplementary material for: Molecular identification based on mtDNA analysis of commercial crustaceans in the coastal Amazon: exotic species, cryptic diversity, and implications for sustainable fisheries in northern Brazil
Source: PeerJ. 2025 Oct 13;13:e19586. doi: 10.7717/peerj.19586 (PMC12530202; doi:10.7717/peerj.19586)
Supplement: Supplemental Information 3 — Sequences from the NCBI database were included in the analysis. [file peerj-13-19586-s003.xlsx]

## Sheet: Planilha1
N	Haplotypes	Genetic distance
		1	2	3	4	5	6	7	8	9	10	11	12	13	14	15	16	17	18	19	20	21	22	23	24	25	26	27	28	29	30	31	32	33	34	35	36	37	38	39	40	41
1	MT607578_Penaeus schmitti
2	Cbr01_P. schmitti	0
3	MW027142_Penaeus vannamei	0.121531	0.121531
4	Cca14_P. vannamei	0.121531	0.121531	0
5	MG662009_Penaeus isabelae	0.135569	0.135569	0.150566	0.150566
6	Cbr55_P. isabelae	0.133356	0.133356	0.150566	0.150566	0.00178891
7	Cca10_P. isabelae	0.131154	0.131154	0.146072	0.146072	0.0108307	0.0126589
8	MT449918_Penaeus monodon clade A	0.184923	0.184923	0.186453	0.186453	0.145808	0.14359	0.14359
9	Ct04_P. monodon clade A	0.184923	0.184923	0.186453	0.186453	0.145808	0.14359	0.14359	0
10	MT449922_Penaeus monodon clade B	0.16161	0.16161	0.179488	0.179488	0.139405	0.137203	0.139405	0.0722918	0.0722918
11	Ct05_P. monodon clade B	0.16161	0.16161	0.179488	0.179488	0.139405	0.137203	0.139405	0.0722918	0.0722918	0
12	KY449120_Xiphopenaeus dincao	0.205348	0.205348	0.224622	0.224622	0.206734	0.20433	0.211576	0.18859	0.18859	0.191665	0.191665
13	Cbr19_X. dincao	0.205348	0.205348	0.224622	0.224622	0.206734	0.20433	0.211576	0.18859	0.18859	0.191665	0.191665	0
14	KY449079_Xiphopenaeus kroyeri	0.221948	0.221948	0.232075	0.232075	0.216363	0.21882	0.216363	0.234827	0.234827	0.225552	0.225552	0.103599	0.103599
15	Cpi04_X. kroyeri	0.221948	0.221948	0.232075	0.232075	0.216363	0.21882	0.216363	0.234827	0.234827	0.225552	0.225552	0.103599	0.103599	0
16	Cpi13_X. kroyeri	0.226985	0.226985	0.237216	0.237216	0.21882	0.221289	0.21882	0.237411	0.237411	0.228117	0.228117	0.107956	0.107956	0.00358424	0.00358424
17	KP297897_Mierspenaeopsis sculptilis	0.228644	0.228644	0.259662	0.259662	0.228316	0.228316	0.225835	0.236366	0.236366	0.249473	0.249473	0.213683	0.213683	0.196196	0.196196	0.193775
18	Carc05_M. sculptilis	0.228644	0.228644	0.259662	0.259662	0.228316	0.228316	0.225835	0.236366	0.236366	0.249473	0.249473	0.213683	0.213683	0.196196	0.196196	0.193775	0
19	KU313508_Ucides cordatus	0.200213	0.200213	0.222439	0.222439	0.198473	0.200912	0.188834	0.241044	0.241044	0.226264	0.226264	0.204818	0.204818	0.222267	0.222267	0.224792	0.228905	0.228905
20	Car01_U. cordatus	0.202634	0.202634	0.224971	0.224971	0.200912	0.203363	0.191226	0.238493	0.238493	0.22877	0.22877	0.202396	0.202396	0.219755	0.219755	0.222267	0.226392	0.226392	0.00178891
21	Car13_U. cordatus	0.202634	0.202634	0.224971	0.224971	0.200912	0.203363	0.191226	0.238493	0.238493	0.22877	0.22877	0.202396	0.202396	0.219755	0.219755	0.222267	0.226392	0.226392	0.00178891	0
22	Car02_U. cordatus	0.200213	0.200213	0.222439	0.222439	0.198473	0.200912	0.188834	0.241044	0.241044	0.226264	0.226264	0.204818	0.204818	0.222267	0.222267	0.224792	0.228905	0.228905	0	0.00178891	0.00178891
23	Car12_U. cordatus	0.207512	0.207512	0.230073	0.230073	0.198473	0.200912	0.19363	0.248776	0.248776	0.22877	0.22877	0.204818	0.204818	0.22733	0.22733	0.224792	0.226392	0.226392	0.00719437	0.00900925	0.00900925	0.00719437
24	Car15_U. cordatus	0.202634	0.202634	0.222439	0.222439	0.203363	0.205826	0.19363	0.243608	0.243608	0.226264	0.226264	0.209696	0.209696	0.224792	0.224792	0.22733	0.23143	0.23143	0.00538605	0.00719437	0.00719437	0.00538605	0.0126589
25	Car16_U. cordatus	0.200213	0.200213	0.222439	0.222439	0.198473	0.200912	0.188834	0.235955	0.235955	0.221289	0.221289	0.204818	0.204818	0.222267	0.222267	0.224792	0.228905	0.228905	0.00358424	0.00538605	0.00538605	0.00358424	0.0108307	0.00900925
26	MN811220_Callinectes bocourti	0.229047	0.229047	0.244078	0.244078	0.22593	0.223454	0.220991	0.255721	0.255721	0.23062	0.23062	0.243469	0.243469	0.25138	0.25138	0.25663	0.234287	0.234287	0.195405	0.197803	0.197803	0.195405	0.200213	0.200213	0.195405
27	Sir05_C. bocourti	0.224022	0.224022	0.238923	0.238923	0.22593	0.223454	0.220991	0.263575	0.263575	0.233114	0.233114	0.246039	0.246039	0.253998	0.253998	0.259275	0.236851	0.236851	0.195405	0.197803	0.197803	0.195405	0.200213	0.200213	0.195405	0.00900925
28	Sir06_C. bocourti	0.231579	0.231579	0.241494	0.241494	0.228417	0.22593	0.223454	0.258325	0.258325	0.233114	0.233114	0.243469	0.243469	0.25138	0.25138	0.25663	0.236851	0.236851	0.197803	0.200213	0.200213	0.197803	0.202634	0.202634	0.197803	0.00358424	0.0126589
29	Sir08_C. bocourti	0.229047	0.229047	0.244078	0.244078	0.22593	0.223454	0.220991	0.255721	0.255721	0.23062	0.23062	0.243469	0.243469	0.25138	0.25138	0.25663	0.234287	0.234287	0.195405	0.197803	0.197803	0.195405	0.200213	0.200213	0.195405	0	0.00900925	0.00358424
30	Sir09_C. bocourti	0.231579	0.231579	0.246675	0.246675	0.228417	0.22593	0.223454	0.258325	0.258325	0.233114	0.233114	0.246039	0.246039	0.253998	0.253998	0.259275	0.236851	0.236851	0.197803	0.200213	0.200213	0.197803	0.202634	0.202634	0.197803	0.00178891	0.0108307	0.00538605	0.00178891
31	Sir01_C. bocourti	0.226528	0.226528	0.241494	0.241494	0.22593	0.223454	0.220991	0.25313	0.25313	0.228139	0.228139	0.243469	0.243469	0.25138	0.25138	0.25663	0.234287	0.234287	0.195405	0.197803	0.197803	0.195405	0.200213	0.200213	0.195405	0.00178891	0.0108307	0.00538605	0.00178891	0.00358424
32	Sir02_C. bocourti	0.226528	0.226528	0.241494	0.241494	0.223454	0.220991	0.21854	0.25313	0.25313	0.233114	0.233114	0.240911	0.240911	0.253998	0.253998	0.259275	0.231736	0.231736	0.193019	0.195405	0.195405	0.193019	0.197803	0.197803	0.193019	0.00178891	0.0108307	0.00538605	0.00178891	0.00358424	0.00358424
33	MF490043_Panulirus meripurpuratus	0.267297	0.267297	0.31876	0.31876	0.295229	0.298015	0.292459	0.295895	0.295895	0.284814	0.284814	0.298463	0.298463	0.298777	0.298777	0.301676	0.277266	0.277266	0.28603	0.288824	0.288824	0.28603	0.291633	0.288824	0.283252	0.291105	0.291105	0.288248	0.291105	0.293978	0.293978	0.293978
34	Lag01_P. meripurpuratus	0.27	0.27	0.321701	0.321701	0.298015	0.300816	0.295229	0.298777	0.298777	0.287639	0.287639	0.301353	0.301353	0.301676	0.301676	0.304591	0.280067	0.280067	0.28603	0.288824	0.288824	0.28603	0.291633	0.288824	0.283252	0.288248	0.288248	0.285407	0.288248	0.291105	0.291105	0.291105	0.00538605
35	Lag02_P. meripurpuratus	0.272717	0.272717	0.32466	0.32466	0.298015	0.300816	0.295229	0.301676	0.301676	0.29048	0.29048	0.30426	0.30426	0.301676	0.301676	0.304591	0.277266	0.277266	0.28603	0.288824	0.288824	0.28603	0.291633	0.288824	0.283252	0.293978	0.293978	0.291105	0.293978	0.296868	0.296868	0.296868	0.00538605	0.00719437
36	AF339462_Panulirus laevicauda	0.241836	0.241836	0.253525	0.253525	0.258325	0.260943	0.260943	0.245438	0.245438	0.258761	0.258761	0.268438	0.268438	0.251725	0.251725	0.257003	0.259275	0.259275	0.279488	0.282289	0.282289	0.279488	0.285106	0.279488	0.279488	0.276768	0.284942	0.276768	0.276768	0.279478	0.276768	0.279478	0.258837	0.267034	0.264287
37	Lsa03_P. laevicauda	0.234123	0.234123	0.243215	0.243215	0.247989	0.250553	0.245438	0.2429	0.2429	0.264052	0.264052	0.273932	0.273932	0.257003	0.257003	0.262336	0.25663	0.25663	0.268438	0.271177	0.271177	0.268438	0.273932	0.273932	0.268438	0.268725	0.276768	0.268725	0.268725	0.271391	0.268725	0.266072	0.264287	0.272574	0.264287	0.0181838
38	MW479976_Macrobrachium equidens	0.231901	0.231901	0.26255	0.26255	0.246186	0.243608	0.238493	0.26959	0.26959	0.272095	0.272095	0.226264	0.226264	0.241044	0.241044	0.246186	0.28653	0.28653	0.243756	0.24634	0.24634	0.243756	0.254173	0.24634	0.243756	0.262131	0.256812	0.264812	0.262131	0.264812	0.262131	0.259464	0.309457	0.309457	0.315356	0.28349	0.28072
39	Cpi43_M. equidens	0.234459	0.234459	0.265245	0.265245	0.246186	0.243608	0.238493	0.272293	0.272293	0.274805	0.274805	0.22877	0.22877	0.238493	0.238493	0.243608	0.283737	0.283737	0.24634	0.248938	0.248938	0.24634	0.256812	0.248938	0.24634	0.264812	0.259464	0.267507	0.264812	0.267507	0.264812	0.262131	0.312398	0.312398	0.318333	0.286276	0.28349	0.00178891
40	OL824984_Macrobrachium rosenbergii	0.264609	0.264609	0.273176	0.273176	0.266072	0.268725	0.274072	0.279137	0.279137	0.285141	0.285141	0.254357	0.254357	0.226264	0.226264	0.22877	0.302205	0.302205	0.265475	0.268192	0.268192	0.265475	0.265475	0.265475	0.262772	0.275924	0.284257	0.270444	0.275924	0.278686	0.275924	0.273176	0.333973	0.333973	0.340071	0.276944	0.282394	0.203363	0.203363
41	Cpit02_M. rosenbergii	0.264609	0.264609	0.273176	0.273176	0.266072	0.268725	0.274072	0.279137	0.279137	0.285141	0.285141	0.254357	0.254357	0.226264	0.226264	0.22877	0.302205	0.302205	0.265475	0.268192	0.268192	0.265475	0.265475	0.265475	0.262772	0.275924	0.284257	0.270444	0.275924	0.278686	0.275924	0.273176	0.333973	0.333973	0.340071	0.276944	0.282394	0.203363	0.203363	0
