# Supplementary material for: Molecular identification based on mtDNA analysis of commercial crustaceans in the coastal Amazon: exotic species, cryptic diversity, and implications for sustainable fisheries in northern Brazil
Source: PeerJ. 2025 Oct 13;13:e19586. doi: 10.7717/peerj.19586 (PMC12530202; doi:10.7717/peerj.19586)
Supplement: Supplemental Information 4 — Sequences from the NCBI database were included in the analysis. [file peerj-13-19586-s004.xlsx]

## Sheet: Planilha1
N	Haplotypes	Genetic distance
		1	2	3	4	5	6	7	8	9	10	11	12	13	14	15	16	17	18	19	20	21	22	23	24	25	26	27	28	29	30	31	32	33	34	35	36	37	38	39	40	41	42	43	44	45
1	AY135189_Penaeus schmitti
2	Cbr56_P. schmitti	0
3	Cbr45_P. schmitti	0.00235849	0.00235849
4	Cbr05_P. schmitti	0.00472817	0.00472817	0.00710912
5	MT178583_Penaeus vannamei	0.11286	0.11286	0.115725	0.11286
6	Cva01_P. vannamei	0.11286	0.11286	0.115725	0.11286	0
7	Cpic02_P. vannamei	0.115725	0.115725	0.118607	0.115725	0.00235849	0.00235849
8	Cca06_P. vannamei	0.11286	0.11286	0.115725	0.11286	0.00472817	0.00472817	0.00235849
9	MN240522_Penaeus isabelae	0.123359	0.123359	0.120494	0.123359	0.11842	0.11842	0.121311	0.121311
10	Cba02_P. isabelae	0.123359	0.123359	0.120494	0.123359	0.11842	0.11842	0.121311	0.121311	0
11	Cca30_P. isabelae	0.132055	0.132055	0.12914	0.132055	0.121311	0.121311	0.124218	0.124218	0.00710912	0.00710912
12	Cca33_P. isabelae	0.126241	0.126241	0.123359	0.126241	0.121311	0.121311	0.124218	0.124218	0.00235849	0.00235849	0.00950147
13	Cca07_P. isabelae	0.12914	0.12914	0.126241	0.12914	0.11842	0.11842	0.121311	0.121311	0.00472817	0.00472817	0.00235849	0.00710912
14	Cbr42_P. isabelae	0.137938	0.137938	0.134988	0.137938	0.11842	0.11842	0.121311	0.121311	0.0119053	0.0119053	0.00472817	0.0143208	0.00710912
15	KX459267_Penaeus monodon clade A	0.151607	0.151607	0.154601	0.145672	0.158176	0.158176	0.161234	0.158176	0.140535	0.140535	0.149491	0.143503	0.146488	0.155551
16	Cts04_P. monodon clade A	0.151607	0.151607	0.154601	0.145672	0.158176	0.158176	0.161234	0.158176	0.140535	0.140535	0.149491	0.143503	0.146488	0.155551	0.00235849
17	Ct05_P. monodon clade B	0.151461	0.151461	0.148493	0.151461	0.154946	0.154946	0.157977	0.154946	0.154601	0.154601	0.163692	0.151607	0.160643	0.163692	0.110366	0.107517
18	DQ084368_Xiphopenaeus kroyeri	0.209245	0.209245	0.205988	0.209245	0.202553	0.202553	0.199348	0.196164	0.196531	0.196531	0.206209	0.199736	0.202962	0.202962	0.216345	0.213023	0.239892
19	Cgr02_X. kroyeri	0.209245	0.209245	0.205988	0.209245	0.202553	0.202553	0.199348	0.196164	0.196531	0.196531	0.206209	0.199736	0.202962	0.202962	0.216345	0.213023	0.239892	0
20	Cpi44_X. kroyeri	0.209245	0.209245	0.205988	0.209245	0.205779	0.205779	0.202553	0.199348	0.199736	0.199736	0.209477	0.202962	0.206209	0.206209	0.216345	0.213023	0.239892	0.00235849	0.00235849
21	Cpi46_X. kroyeri	0.212524	0.212524	0.209245	0.212524	0.209026	0.209026	0.205779	0.202553	0.202962	0.202962	0.212767	0.206209	0.209477	0.209477	0.21969	0.216345	0.243388	0.00472817	0.00472817	0.00235849
22	Cpi12_X. kroyeri	0.209245	0.209245	0.205988	0.209245	0.202553	0.202553	0.199348	0.196164	0.196531	0.196531	0.206209	0.199736	0.202962	0.202962	0.216345	0.213023	0.239892	0.00235849	0.00235849	0.00472817	0.00710912
23	DQ084376_Xiphopenaeus dincao	0.249726	0.249726	0.253273	0.249726	0.219146	0.219146	0.215824	0.212524	0.221979	0.221979	0.225324	0.218657	0.228691	0.221979	0.235213	0.235213	0.23208	0.137912	0.137912	0.134872	0.137912	0.14097
24	Cpi39_X. dincao	0.249726	0.249726	0.253273	0.249726	0.219146	0.219146	0.215824	0.212524	0.221979	0.221979	0.225324	0.218657	0.228691	0.221979	0.235213	0.235213	0.23208	0.137912	0.137912	0.134872	0.137912	0.14097	0
25	Cpic01_X. dincao	0.242709	0.242709	0.246205	0.242709	0.219146	0.219146	0.215824	0.212524	0.218657	0.218657	0.215356	0.215356	0.218657	0.218657	0.231811	0.231811	0.235493	0.14097	0.14097	0.137912	0.14097	0.144047	0.0119053	0.0119053
26	MT178686_Mierspenaeopsis sculptilis	0.236497	0.236497	0.239831	0.236497	0.241257	0.241257	0.241257	0.237844	0.227353	0.227353	0.230676	0.230676	0.23402	0.23402	0.227541	0.227541	0.217842	0.218657	0.218657	0.215356	0.212078	0.221979	0.219411	0.219411	0.219411
27	Carc05_M. sculptilis	0.236497	0.236497	0.239831	0.236497	0.237844	0.237844	0.237844	0.234455	0.224053	0.224053	0.227353	0.227353	0.230676	0.230676	0.22423	0.22423	0.20845	0.212524	0.212524	0.209245	0.205988	0.215824	0.22336	0.22336	0.22336	0.0240021
28	KM255682_Macrobrachium equidens	0.26844	0.26844	0.264869	0.261323	0.245255	0.245255	0.241795	0.238359	0.221522	0.221522	0.221522	0.224844	0.224844	0.221522	0.216078	0.219411	0.254426	0.23893	0.23893	0.235493	0.23208	0.23893	0.244435	0.244435	0.258373	0.23718	0.23423
29	Cam02_M. equidens	0.26844	0.26844	0.264869	0.261323	0.245255	0.245255	0.241795	0.238359	0.221522	0.221522	0.221522	0.224844	0.224844	0.221522	0.216078	0.219411	0.254426	0.23893	0.23893	0.235493	0.23208	0.23893	0.244435	0.244435	0.258373	0.23718	0.23423	0
30	Cpi43_M. equidens	0.264869	0.264869	0.261323	0.257802	0.24874	0.24874	0.245255	0.241795	0.224844	0.224844	0.224844	0.228189	0.228189	0.224844	0.219411	0.222767	0.258036	0.235493	0.235493	0.23208	0.228691	0.235493	0.24101	0.24101	0.254852	0.240558	0.237609	0.00472817	0.00472817
31	Ccac02_M. equidens	0.261613	0.261613	0.25808	0.254571	0.245558	0.245558	0.242086	0.238637	0.221744	0.221744	0.221744	0.225077	0.225077	0.221744	0.21969	0.223057	0.254839	0.232364	0.232364	0.228962	0.225584	0.232364	0.241257	0.241257	0.255147	0.240355	0.237387	0.00472117	0.00472117	0.00472117
32	MK782972_Macrobrachium rosenbergii	0.305632	0.305632	0.301786	0.313414	0.281973	0.281973	0.285636	0.281973	0.296789	0.296789	0.289326	0.293044	0.293044	0.289326	0.277121	0.280825	0.269434	0.255782	0.255782	0.259341	0.255782	0.255782	0.314402	0.314402	0.32237	0.304771	0.300188	0.211806	0.211806	0.211806	0.205444
33	Cam01_M. rosenbergii	0.305632	0.305632	0.301786	0.313414	0.281973	0.281973	0.285636	0.281973	0.296789	0.296789	0.289326	0.293044	0.293044	0.289326	0.277121	0.280825	0.269434	0.255782	0.255782	0.259341	0.255782	0.255782	0.314402	0.314402	0.32237	0.304771	0.300188	0.211806	0.211806	0.211806	0.205444	0
34	Cpit01_M. rosenbergii	0.308617	0.308617	0.304771	0.316399	0.285013	0.285013	0.288676	0.285013	0.303602	0.303602	0.296083	0.299829	0.299829	0.296083	0.280037	0.283741	0.272366	0.258681	0.258681	0.262239	0.258681	0.258681	0.317351	0.317351	0.32532	0.307792	0.303246	0.21788	0.21788	0.21788	0.21147	0.00472258	0.00472258
35	Car13_U. cordatus	0.237609	0.237609	0.23423	0.237609	0.231088	0.231088	0.227743	0.227743	0.224844	0.224844	0.228189	0.228189	0.228189	0.228189	0.227541	0.22423	0.227353	0.266658	0.266658	0.270167	0.2737	0.266658	0.313946	0.313946	0.317793	0.23718	0.246945	0.261919	0.261919	0.258373	0.258681	0.235213	0.235213	0.241519
36	Car15_U. cordatus	0.247883	0.247883	0.244435	0.247883	0.227743	0.227743	0.224421	0.224421	0.234946	0.234946	0.238359	0.238359	0.238359	0.238359	0.23423	0.230874	0.230676	0.266658	0.266658	0.270167	0.2737	0.266658	0.321669	0.321669	0.325575	0.250833	0.253818	0.258373	0.258373	0.254852	0.255147	0.235213	0.235213	0.241519	0.0143208
37	Car06_U. cordatus	0.247626	0.247626	0.24419	0.247626	0.227541	0.227541	0.22423	0.22423	0.241519	0.241519	0.244967	0.244967	0.244967	0.244967	0.234455	0.231088	0.23423	0.263369	0.263369	0.266866	0.270387	0.263369	0.318174	0.318174	0.322065	0.247626	0.250594	0.258681	0.258681	0.255147	0.255457	0.24239	0.24239	0.24874	0.0167122	0.00948312
38	Car16_U. cordatus	0.247883	0.247883	0.244435	0.247883	0.227743	0.227743	0.224421	0.224421	0.234946	0.234946	0.238359	0.238359	0.238359	0.238359	0.23423	0.230874	0.230676	0.266658	0.266658	0.270167	0.2737	0.266658	0.321669	0.321669	0.325575	0.250833	0.253818	0.261919	0.261919	0.258373	0.258681	0.228433	0.228433	0.234693	0.016748	0.00710912	0.0118812
39	Car11_U. cordatus	0.247883	0.247883	0.244435	0.247883	0.227743	0.227743	0.224421	0.224421	0.234946	0.234946	0.238359	0.238359	0.238359	0.238359	0.23423	0.230874	0.230676	0.266658	0.266658	0.270167	0.2737	0.266658	0.321669	0.321669	0.325575	0.250833	0.253818	0.261919	0.261919	0.258373	0.258681	0.235213	0.235213	0.241519	0.0119053	0.00235849	0.00709648	0.00472817
40	Car12_U. cordatus	0.244435	0.244435	0.24101	0.244435	0.224421	0.224421	0.22112	0.22112	0.228189	0.228189	0.231556	0.231556	0.231556	0.231556	0.23423	0.230874	0.227353	0.266658	0.266658	0.270167	0.2737	0.266658	0.321669	0.321669	0.325575	0.247385	0.25037	0.261919	0.261919	0.258373	0.258681	0.231811	0.231811	0.238094	0.0143208	0.00950147	0.0142908	0.0119053	0.00710912
41	Car07_U. cordatus	0.251355	0.251355	0.247883	0.251355	0.227743	0.227743	0.224421	0.224421	0.231556	0.231556	0.234946	0.234946	0.234946	0.234946	0.237609	0.23423	0.230676	0.270167	0.270167	0.2737	0.277259	0.270167	0.317793	0.317793	0.321669	0.250833	0.253818	0.261919	0.261919	0.258373	0.258681	0.238637	0.238637	0.244967	0.0143208	0.00472817	0.00948312	0.00710912	0.00235849	0.00950147
42	MH062450_Callinectes danae	0.244694	0.244694	0.241257	0.251638	0.275023	0.275023	0.271425	0.267854	0.264869	0.264869	0.275661	0.26844	0.272037	0.26844	0.251638	0.251638	0.238094	0.234693	0.234693	0.234693	0.231315	0.234693	0.255782	0.255782	0.262925	0.247626	0.25808	0.238359	0.238359	0.234946	0.231811	0.205988	0.205988	0.212078	0.205584	0.20882	0.209026	0.205584	0.205584	0.212078	0.20882
43	Sir13_C. danae	0.248154	0.248154	0.244694	0.255147	0.278646	0.278646	0.275023	0.271425	0.26844	0.26844	0.27931	0.272037	0.275661	0.272037	0.255147	0.255147	0.241519	0.238094	0.238094	0.238094	0.234693	0.238094	0.259341	0.259341	0.266535	0.251087	0.261613	0.244694	0.244694	0.241257	0.238094	0.209245	0.209245	0.215356	0.214943	0.214943	0.218432	0.214943	0.214943	0.221522	0.218222	0.00709225
44	Sir14_C. danae	0.251638	0.251638	0.248154	0.258681	0.282295	0.282295	0.278646	0.275023	0.272037	0.272037	0.282987	0.275661	0.27931	0.275661	0.251638	0.251638	0.244967	0.241519	0.241519	0.241519	0.238094	0.241519	0.262925	0.262925	0.270172	0.254571	0.265172	0.237844	0.237844	0.234455	0.231315	0.202751	0.202751	0.20882	0.211686	0.211686	0.215143	0.211686	0.211686	0.218222	0.214943	0.0118656	0.00472817
45	Sir02_C. bocourti	0.208284	0.208284	0.21151	0.214757	0.230676	0.230676	0.227353	0.224053	0.264581	0.264581	0.271724	0.268139	0.268139	0.264581	0.270387	0.270387	0.24303	0.256636	0.256636	0.260097	0.256636	0.256636	0.267329	0.267329	0.270875	0.233824	0.233824	0.269795	0.269795	0.269795	0.269434	0.258373	0.258373	0.261323	0.208628	0.211875	0.211686	0.208628	0.208628	0.202197	0.205402	0.137585	0.146127	0.14021
